# Supplementary figures and images for: Large-area electrospray-deposited nanocrystalline CuXO hole transport layer for perovskite solar cells
Source: Royal Society of Chemistry journal article supplement (doi:10.1039/c7ra07725d), 2017-01-01

Supporting information S1 Demonstration of large area capability of electrospray process

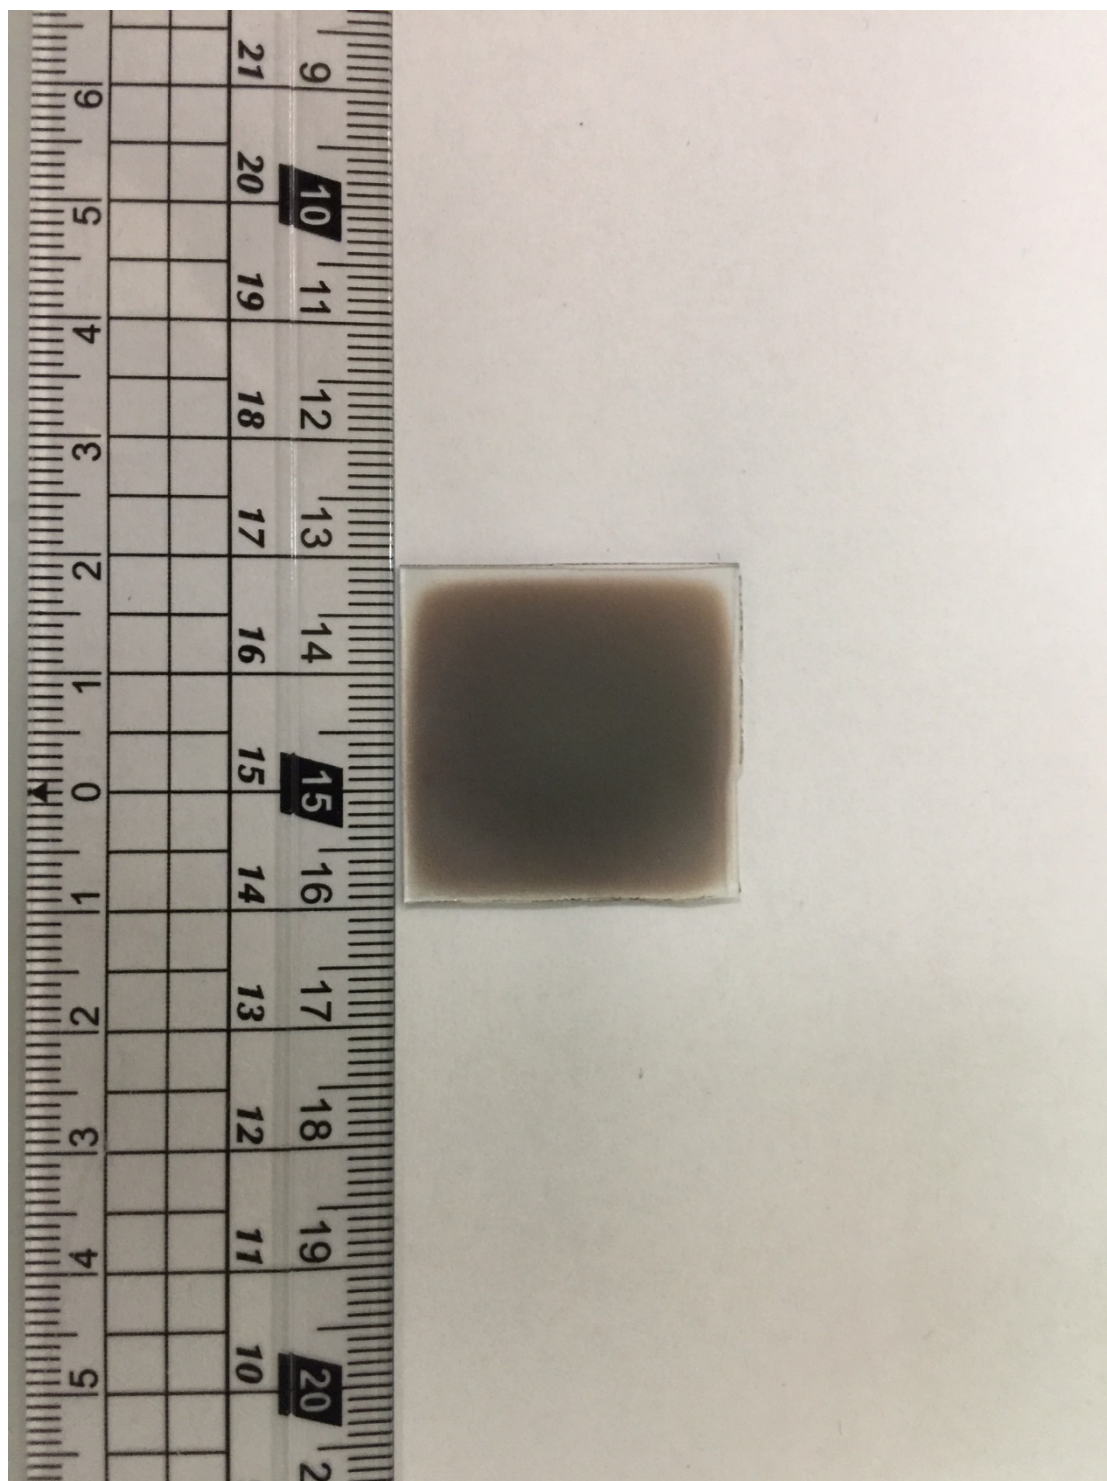

Supplement: c7ra07725d2.pdf [file c7ra07725d2.pdf]
